# Supplementary material
Source: Springer Nature journal article supplement (https://www.springermedizin.de/resource/supplementary/13058_2006_1574_MOESM5_ESM.pdf/9699428)
Supplement: MOESM5 [file 9699428]

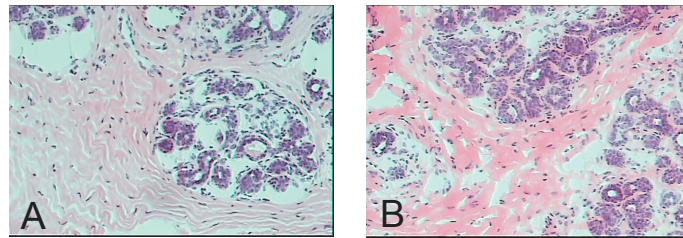

Figure S1
